# Supplementary material for: Effects of acute and repeated administration of the selective M4 PAM VU0152099 on cocaine vs. food choice in male rats
Source: bioRxiv or medRxiv preprint supplement (doi:10.1101/2021.09.06.459176), 2021-09-06
Supplement: Supplementary file [file media-2.pdf]

**Supplemental Table S2.** Full ANOVA outcomes.

Table S2A. ANOVA outcomes for cocaine dose-response functions, repeated VU0152099 dosing

|                                         | Cocaine dose                 | Treatment day              | Interaction                 |
|-----------------------------------------|------------------------------|----------------------------|-----------------------------|
| % cocaine choice<br>Baseline vs.        | F(1.9,13.6)=46.5, $p<0.0001$ | F(2.3,16.3)=4.1, $p=0.03$  | F(3.3,20.2)=1.7, $p=0.19$   |
| Day 1                                   | F(1.3,9.3)=14.8, $p=0.003$   | F(1,7)=1.7, $p=0.24$       | F(1.5,10.8)=2.8, $p=0.11$   |
| Day 4                                   | F(1.8,12.8)=21.7, $p<0.0001$ | F(1,7)=0.59, $p=0.47$      | F(1.9,13.4)=0.92, $p=0.42$  |
| Day 5                                   | F(2.1,14.4)=35.9, $p<0.0001$ | F(1,7)=4.6, $p=0.069$      | F(1.9,13.6)=1.6, $p=0.23$   |
| Day 6                                   | F(1.6,11.2)=13.4, $p=0.002$  | F(1,7)=7.3, $p=0.03$       | F(1.3,7.6)=5.1, $p=0.049$   |
| Day 7                                   | F(2.0,13.9)=14.0, $p=0.0005$ | F(1,7)=25.0, $p=0.002$     | F(2.3,10.5)=10.3, $p=0.003$ |
| Post day 4                              | F(2.3,16.7)=20.3, $p<0.0001$ | F(1,7)=1.9, $p=0.21$       | F(2.3,13.3)=2.7, $p=0.10$   |
| Cocaine reinforcers<br>Baseline vs.     | F(1.6,11.3)=13.8, $p=0.001$  | F(3.3,23.0)=3.6, $p=0.02$  | F(20,125)=1.9, $p=0.01$     |
| Day 1                                   | F(1.5,10.5)=40.7, $p<0.0001$ | F(1,7)=2.8, $p=0.14$       | F(1.6,11.2)=3.7, $p=0.067$  |
| Day 4                                   | F(1.8,12.7)=49.8, $p<0.0001$ | F(1,7)=2.0, $p=0.21$       | F(1.9,13.6)=1.1, $p=0.37$   |
| Day 5                                   | F(1.9,13.6)=95.0, $p<0.0001$ | F(1,7)=4.8, $p=0.064$      | F(1.8,12.3)=1.4, $p=0.27$   |
| Day 6                                   | F(1.7,11.6)=31.4, $p<0.0001$ | F(1,7)=3.5, $p=0.11$       | F(2.0,9.8)=2.3, $p=0.15$    |
| Day 7                                   | F(2.3,16.4)=20.3, $p<0.0001$ | F(1,7)=11.5, $p=0.02$      | F(3.2,14.3)=9.0, $p=0.001$  |
| Post day 4                              | F(2.4,16.6)=57.3, $p<0.0001$ | F(1,7)=3.1, $p=0.12$       | F(2.3,12.4)=1.5, $p=0.26$   |
| Food reinforcers                        | F(2.6,18.0)=50.7, $p<0.0001$ | F(1.5,10.6)=1.0, $p=0.37$  | F(3.9,24.1)=2.2, $p=0.10$   |
| Total response rate                     | F(1.4,10.0)=4.6, $p=0.048$   | F(1.6,11.5)=0.78, $p=0.46$ | F(2.7,17.0)=1.2, $p=0.34$   |
| Cocaine+Food<br>levers response<br>rate | F(1.7,12.2)=2.2, $p=0.16$    | F(1.8,12.3)=1.3, $p=0.30$  | F(4.5,28.3)=0.58, $p=0.70$  |

Table S2B. ANOVA outcomes for session-wide cocaine and food intakes and cocaine  $A_{50}$

|                                               | Mixed-effect analysis      | Test for trend                   |
|-----------------------------------------------|----------------------------|----------------------------------|
| <i>Acute dosing, effect of VU0152099 dose</i> |                            |                                  |
| Log( $A_{50}$ ) cocaine dose                  | F(1.8,9.3)=3.9, $p=0.06$   | Nonlinear F(5,32)=3.8, $p=0.008$ |
| Cocaine intake / session                      | F(1.4,7.9)=3.5, $p=0.09$   | Nonlinear F(5,33)=3.0, $p=0.02$  |
| Food intake / session                         | F(1.6,8.9)=2.8, $p=0.12$   | Nonlinear F(5,33)=2.8, $p=0.03$  |
| <i>Repeated dosing, effect of day</i>         |                            |                                  |
| Log( $A_{50}$ ) cocaine dose                  | F(2.6,14.9)=3.4, $p=0.054$ | Linear F(1,38)=11.3, $p=0.002$   |
| Cocaine intake / session                      | F(1.4,8.7)=2.5, $p=0.15$   | Linear F(1,32)=9.7, $p=0.004$    |
| Food intake / session                         | F(1.5,9.5)=1.0, $p=0.37$   | No significant trend, $p>0.28$   |

Table S2C. ANOVA outcomes for cocaine dose-response functions, acute VU0152099 dosing

| VU0152099 dose                                           | Cocaine unit dose            | Treatment day vs. baseline | Cocaine by treatment Interaction |
|----------------------------------------------------------|------------------------------|----------------------------|----------------------------------|
| <i>Percent cocaine choice</i>                            |                              |                            |                                  |
| Vehicle                                                  | F(1.1,6.6)=47.6, $p=0.0003$  | F(1,6)=5.7, $p=0.054$      | F(1.3,7.0)=7.9, $p=0.02$         |
| 0.32 mg/kg                                               | F(1.5,7.4)=28.6, $p=0.0005$  | F(1,5)=2.0, $p=0.21$       | F(1.5,7.3)=2.2, $p=0.18$         |
| 1.0 mg/kg                                                | F(1.9,11.4)=27.8, $p<0.0001$ | F(1,6)=1.8, $p=0.23$       | F(1.6, 8.5)=2.0, $p=0.16$        |
| 1.8 mg/kg                                                | F(1.3,7.8)=90.0, $p<0.0001$  | F(1,6)=5.0, $p=0.068$      | F(1.7,9.6)=2.3, $p=0.15$         |
| 3.2 mg/kg                                                | F(2.2,13.4)=56.7, $p<0.0001$ | F(1,6)=2.1, $p=0.20$       | F(1.7,10.5)=0.75, $p=0.48$       |
| 5.6 mg/kg                                                | F(1.7,6.8)=50.0, $p<0.0001$  | F(1,4)=1.7, $p=0.35$       | F(1.4,5.3)=0.88, $p=0.35$        |
| <i>Cocaine reinforcers taken</i>                         |                              |                            |                                  |
| Vehicle                                                  | F(1.2,7.0)=29.0, $p=0.0008$  | F(1,6)=6.7, $p=0.04$       | F(1.5,8.7)=7.5, $p=0.02$         |
| 0.32 mg/kg                                               | F(1.4,7.4)=11.6, $p=0.007$   | F(1,5)=3.1, $p=0.14$       | F(1.7,8.5)=2.3, $p=0.16$         |
| 1.0 mg/kg                                                | F(1.5,9.3)=18.3, $p=0.0009$  | F(1,6)=2.3, $p=0.18$       | F(1.9,11.5)=2.4, $p=0.13$        |
| 1.8 mg/kg                                                | F(1.3,7.6)=42.3, $p=0.0002$  | F(1,6)=8.5, $p=0.03$       | F(1.7,10.0)=2.2, $p=0.16$        |
| 3.2 mg/kg                                                | F(2.0,11.8)=31.1, $p<0.0001$ | F(1,6)=3.8, $p=0.10$       | F(1.4,8.7)=1.8, $p=0.22$         |
| 5.6 mg/kg                                                | F(1.6,6.4)=31.7, $p=0.0006$  | F(1,4)=1.0, $p=0.37$       | F(1.8,7.3)=1.2, $p=0.35$         |
| <i>Liquid food reinforcers taken</i>                     |                              |                            |                                  |
| Vehicle                                                  | F(1.1,6.5)=45.3, $p=0.0003$  | F(1,6)=9.1, $p=0.02$       | F(1.4,8.0)=7.6, $p=0.02$         |
| 0.32 mg/kg                                               | F(1.9,9.6)=15.3, $p=0.001$   | F(1,5)=3.3, $p=0.13$       | F(1.4,6.9)=1.8, $p=0.23$         |
| 1.0 mg/kg                                                | F(1.9,11.5)=31.1, $p<0.0001$ | F(1,6)=0.12, $p=0.74$      | F(1.5,9.2)=2.3, $p=0.16$         |
| 1.8 mg/kg                                                | F(2.5,15.2)=43.8, $p<0.0001$ | F(1,6)=0.97, $p=0.36$      | F(2.1,12.4)=2.8, $p=0.10$        |
| 3.2 mg/kg                                                | F(2.0,12.2)=49.1, $p<0.0001$ | F(1,6)=0.50, $p=0.51$      | F(1.7,10.6)=1.7, $p=0.23$        |
| 5.6 mg/kg                                                | F(1.7,7.1)=43.9, $p<0.0001$  | F(1,4)=1.8, $p=0.26$       | F(1.3,5.3)=0.74, $p=0.47$        |
| <i>Responses per minute, all levers</i>                  |                              |                            |                                  |
| Vehicle                                                  | F(1.6,9.8)=9.7, $p=0.006$    | F(1,6)=2.9, $p=0.14$       | F(1.9,11.2)=0.74, $p=0.49$       |
| 0.32 mg/kg                                               | F(1.4,8.4)=5.4, $p=0.04$     | F(1,6)=0.63, $p=0.46$      | F(1.4, 8.9)=2.9, $p=0.12$        |
| 1.0 mg/kg                                                | F(1.3,7.9)=11.8, $p=0.007$   | F(1,6)=0.04, $p=0.85$      | F(1.8,10.6)=0.78, $p=0.47$       |
| 1.8 mg/kg                                                | F(1.3,8.1)=14.9, $p<0.003$   | F(1,6)=0.15, $p=0.71$      | F(1.5,8.9)=1.2, $p=0.34$         |
| 3.2 mg/kg                                                | F(1.3,8.1)=14.9, $p=0.003$   | F(1,6)=0.15, $p=0.71$      | F(1.5,8.9)=1.2, $p=0.34$         |
| 5.6 mg/kg                                                | F(1.3,5.1)=11.3, $p=0.02$    | F(1,4)=0.82, $p=0.41$      | F(2.4,9.7)=3.9, $p=0.055$        |
| <i>Responses per minute, reinforcer selection levers</i> |                              |                            |                                  |
| Vehicle                                                  | F(1.8,10.7)=1.2, $p=0.35$    | F(1,6)=1.3, $p=0.29$       | F(2.7,16.0)=1.4, $p=0.27$        |
| 0.32 mg/kg                                               | F(3.2,15.9)=1.5, $p=0.24$    | F(1,5)=41.6, $p=0.001$     | F(3.0,14.8)=0.74, $p=0.54$       |
| 1.0 mg/kg                                                | F(1.2,7.2)=1.6, $p=0.25$     | F(1,6)=0.60, $p=0.47$      | F(1.4,8.8)=1.1, $p=0.36$         |
| 1.8 mg/kg                                                | F(2.1,12.9)=3.4, $p=0.064$   | F(1,6)=1.2, $p=0.32$       | F(2.0,11.8)=1.3, $p=0.30$        |
| 3.2 mg/kg                                                | F(2.4,14.3)=2.8, $p=0.09$    | F(1,6)=0.21, $p=0.66$      | F(1.9,11.3)=0.99, $p=0.40$       |
| 5.6 mg/kg                                                | F(2.3,9.1)=2.0, $p=0.19$     | F(1,4)=14.0, $p=0.02$      | F(2.0,8.2)=0.52, $p=0.52$        |

Table S2D. ANOVA outcomes for cocaine dose-response functions with VU0152100 in CalDAG-GEFI knockout mice

|                                      | 3-way ANOVA            |
|--------------------------------------|------------------------|
| Pretreatment                         | F(1,42)=19.4, p=0.0001 |
| Cocaine dose                         | F(3,42)=8.08, p=0.004  |
| CalDAG-GEFI genotype                 | F(1,42)=12.6, p=0.001  |
| Cocaine by pretreatment interaction  | F(3,42)=4.28, p=0.02   |
| Cocaine by genotype interaction      | F(3,42)=3.35, p=0.07   |
| Pretreatment by genotype interaction | F(1,42)=0.25, p=0.62   |
| 3-way interaction                    | F(3,42)=0.57, p=0.58   |
