# Supplementary material for: Effects of acute and repeated administration of the selective M4 PAM VU0152099 on cocaine vs. food choice in male rats
Source: bioRxiv or medRxiv preprint supplement (doi:10.1101/2021.09.06.459176), 2021-09-06
Supplement: Supplementary file [file media-4.pdf]

**Supplemental Figure S4. Repeated vehicle treatment**

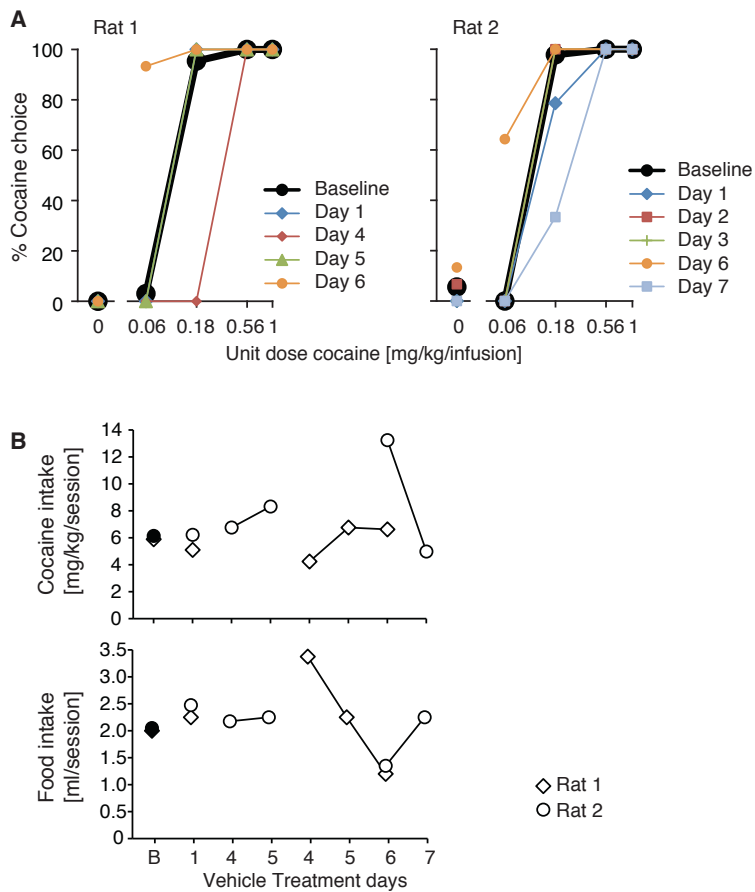

(A) Percent cocaine choice allocation in two rats that received repeated vehicle injections, all days tested; rat 1 started on a Friday, rat 2, on a Wednesday. (B) Session-wide cocaine and food intakes in each rat as a function of successive days (baseline levels shown as filled symbols, treatment days as open symbols; baseline level symbols overlap).
