# Supplementary material for: Effects of acute and repeated administration of the selective M4 PAM VU0152099 on cocaine vs. food choice in male rats
Source: bioRxiv or medRxiv preprint supplement (doi:10.1101/2021.09.06.459176), 2021-09-06
Supplement: Supplementary file [file media-6.pdf]

**Supplemental Figure S6.** Session-summary measures, acute VU0152099 dosing

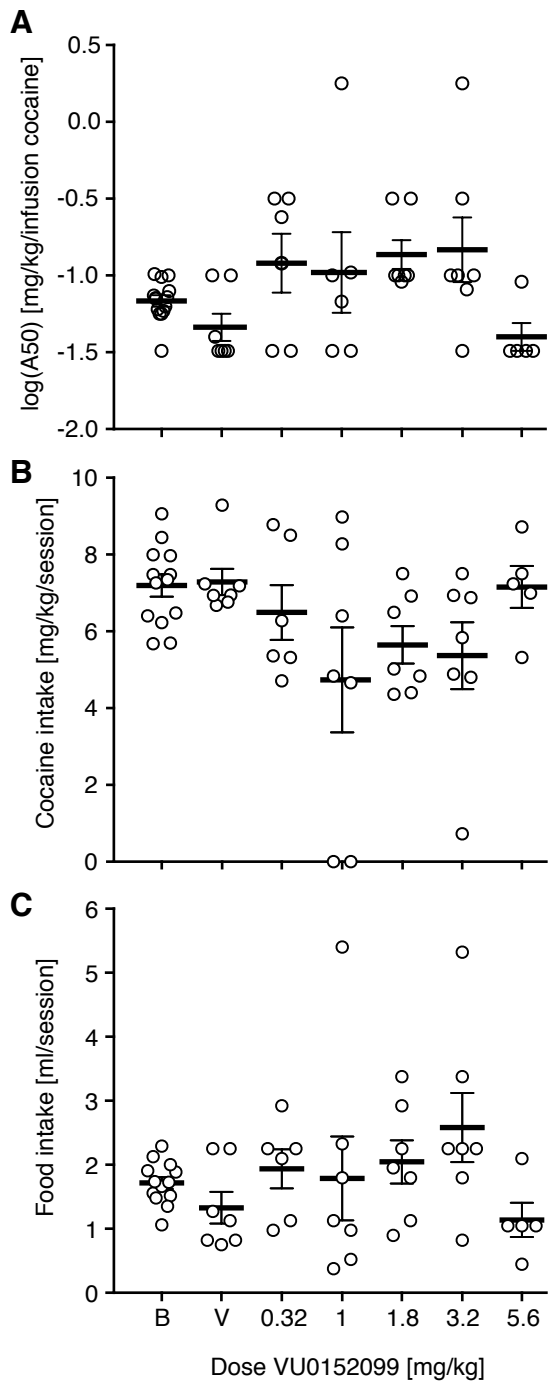

Session-wide cocaine choice A<sub>50</sub> (A) and cocaine (B) and food (C) intakes as functions of acute VU0152099 dose. “B”: baseline performance, “V”: vehicle. Data represent individual rats as well as group means with s.e.m.
